# Supplementary material for: Methodology for the Definition of Durum Wheat Yield Homogeneous Zones by Using Satellite Spectral Indices
Source: MDPI journal article supplement (doi:10.3390/rs13112036), 2021-05-21
Supplement: s1 [file s1]

## Supplementary

**Table S1.** Yield and clustered maps (3 clusters) of the ten fields (about 80 hectares) in the Foggia province, Italy.

| Field                  | Yield Map<br>(Averaged 2018-2019)                                                   | Clustered Map<br>(Based on $\Sigma$ NDVI+GLCM)                                      | Clustered Map<br>(Based on $\Sigma$ MCARI2+GLCM)                                      |
|------------------------|-------------------------------------------------------------------------------------|-------------------------------------------------------------------------------------|---------------------------------------------------------------------------------------|
| 1<br>Area:<br>23.32 ha | 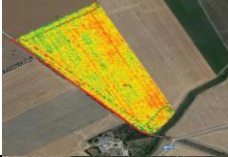   |    |    |
| 2<br>Area:<br>17.08 ha |    |    |    |
| 3<br>Area:<br>6.78 ha  |    |    |    |
| 4<br>Area:<br>10.05 ha |   |   |   |
| 5<br>Area:<br>9.97 ha  |  |  |  |
| 6<br>Area:<br>4.37 ha  |  |  |  |
| 7<br>Area:<br>3.62 ha  |  |  |  |
| 8<br>Area:<br>1.22 ha  |  |  |  |
| 9<br>Area:<br>5.60 ha  |  |  |  |
| 10<br>Area:<br>1.31 ha |  |  |  |
